# Supplementary material for: Size-dependent metal-support interactions in Co/CeO2-Y2O3 catalysts for enhanced methane dry reforming.
Source: Royal Society of Chemistry journal article supplement (doi:10.1039/d5ra00007f), 2025-04-04
Supplement: d5ra00007f1.pdf [file d5ra00007f1.pdf]

## ***Supplemental Information***

Size-dependent metal-support interactions in Co/CeO<sub>2</sub>-Y<sub>2</sub>O<sub>3</sub> catalysts for enhanced methane dry reforming

Yanhui Long<sup>a,b</sup>, Liboting Gao<sup>a</sup>, Yilin Zhang<sup>a</sup>, Wee-Liat Ong<sup>b</sup>, Hao Zhang<sup>a,c,d\*</sup>, Yan jianhua<sup>a,c,d</sup>

<sup>a</sup> State Key Laboratory of Clean Energy Utilization, Zhejiang University, Hangzhou 310027, China.

<sup>b</sup> College of Energy Engineering, ZJU-UIUC, Zhejiang University, Hangzhou 310027, China.

<sup>c</sup> Ningbo Innovation Center, Zhejiang University, Ningbo 315100, China.

<sup>d</sup> Inner Mongolia Daqingshan Laboratory, Hohhot 017000, China

\*Corresponding author: State Key Laboratory of Clean Energy Utilization, Zhejiang University, Hangzhou 310027. Email:

zhang\_hao@zju.edu.cn

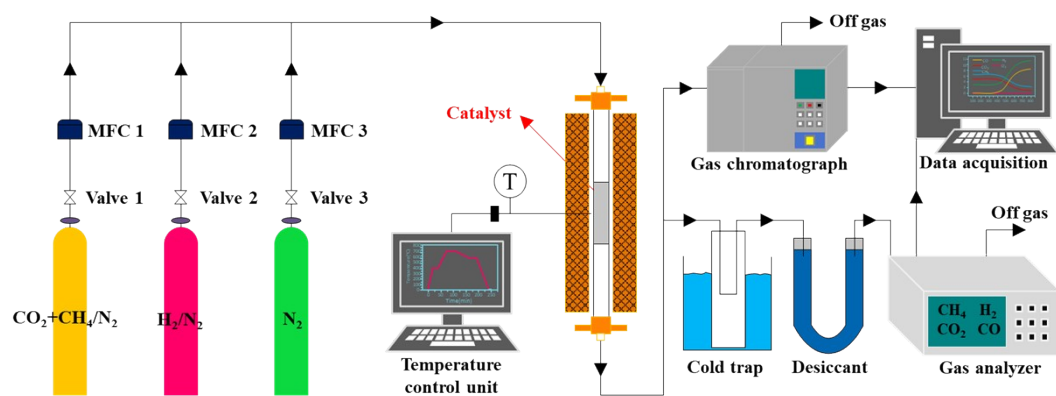

Fig.S1 Schematic of the experimental system.

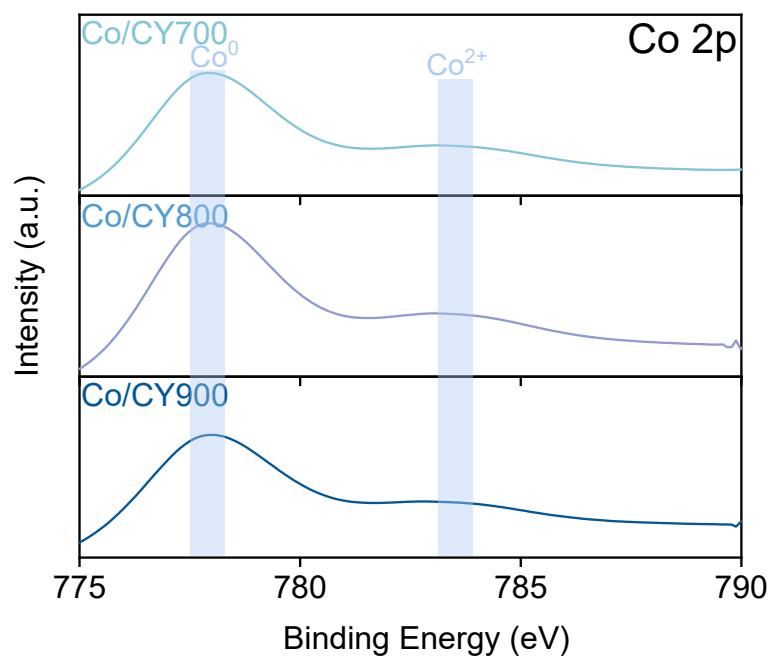

Fig. S2 XPS analysis of the Co 2p peaks of reduced Co/CY<sub>x</sub>.

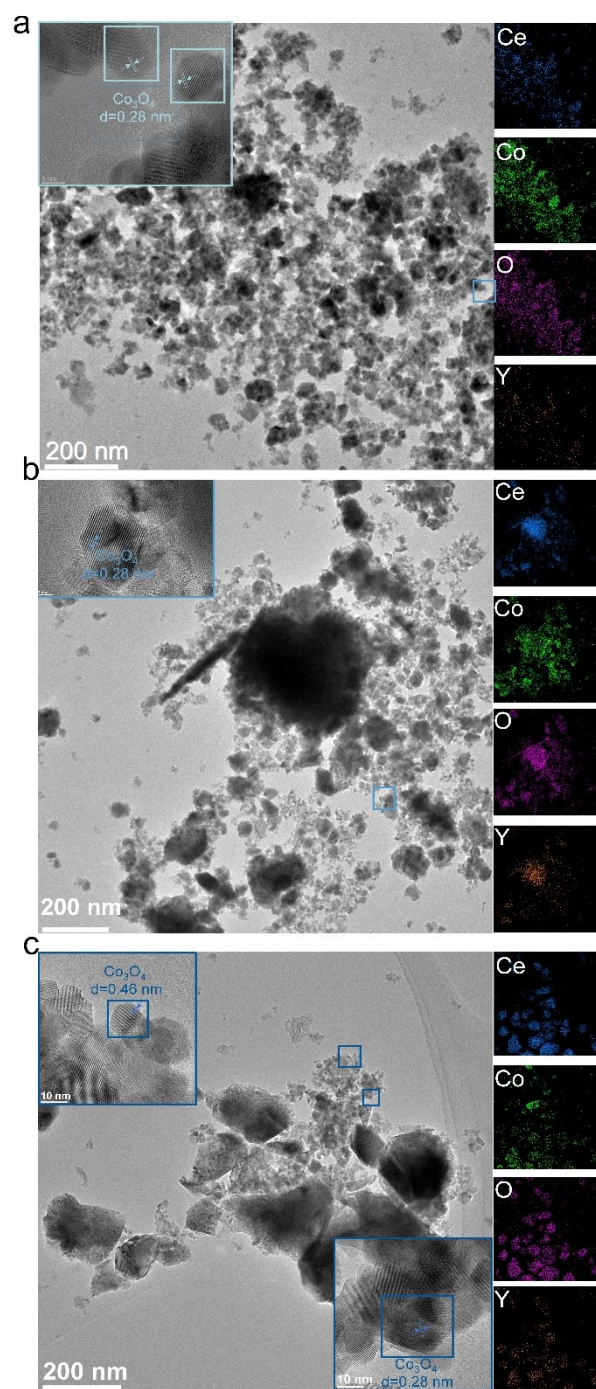

Fig. S3 TEM images and STEM-EDX images of fresh Co/CY<sub>x</sub>: **a** Co/CY700, **b** Co/CY800, **c** Co/CY900.

Table S1 CO pulse of various samples.

| Sample   | Co content (wt.%) | Unit ads. Volume (ml/g) | Determined dispersion of Co (%) |
|----------|-------------------|-------------------------|---------------------------------|
| Co/CY700 | 2.3               | 0.98                    | 11.4                            |
| Co/CY800 | 2.2               | 1.42                    | 17.1                            |
| Co/CY900 | 2.2               | 1.30                    | 15.6                            |
